# Supplementary material for: Morphological evolution process of δ-MnO2 from 2-D to 1-D without phase transition
Source: Royal Society of Chemistry journal article supplement (doi:10.1039/c9ce00715f), 2019-01-01

## Supplementary information

**Table S1** Detailed conditions of as-fabricated Samples and relevant specific capacitances for supercapacitors.

| No. | Sample name                | Duration Time (h) | NaOH (mol L-1)      | Temperature (°C) | Morphology           | specific capacitance (F/g) 1.0 A/g |
|-----|----------------------------|-------------------|---------------------|------------------|----------------------|------------------------------------|
| 1   | MnO <sub>2</sub> -C-0      | 30                | 0 (only pure water) | 170              | fiber                | 135.7                              |
| 2   | MnO <sub>2</sub> -C-2      | 30                | 2                   | 170              | plate                | 92.8                               |
| 3   | MnO <sub>2</sub> -C-4.5    | 30                | 4.5                 | 170              | Plate + belt + fiber | 80.1                               |
| 4   | MnO <sub>2</sub> -C-6.5    | 30                | 6.5                 | 170              | Plate + belt + fiber | 126.0                              |
| 5   | MnO <sub>2</sub> -C-8.5    | 30                | 8.5                 | 170              | belt + fiber         | 142.8                              |
| 6   | MnO <sub>2</sub> -C-10.5   | 30                | 10.5                | 170              | nanofiber            | 150.1                              |
| 7   | MnO <sub>2</sub> -C-12.5   | 30                | 12.5                | 170              | fiber                | 146.0                              |
| 8   | MnO <sub>2</sub> -Tim-0    | 0                 | 10.5                | 170              | plate                | 70.1                               |
| 9   | MnO <sub>2</sub> -Tim-1.5  | 1.5               | 10.5                | 170              | plate                | 172.5                              |
| 10  | MnO <sub>2</sub> -Tim -3   | 3                 | 10.5                | 170              | plate + belt         | 175.7                              |
| 11  | MnO <sub>2</sub> -Tim -10  | 10                | 10.5                | 170              | Plate + fiber        | 120                                |
| 12  | MnO <sub>2</sub> -Tim -20  | 20                | 10.5                | 170              | fiber + plate        | 127.6                              |
| 13  | MnO <sub>2</sub> -Tim -40  | 40                | 10.5                | 170              | fiber                | 129.7                              |
| 14  | MnO <sub>2</sub> -Tep-100  | 30                | 10.5                | 100              | plate                | 54.5                               |
| 15  | MnO <sub>2</sub> -Tep -130 | 30                | 10.5                | 130              | plate +              | 125.5                              |
| 16  | MnO <sub>2</sub> -Tep -150 | 30                | 10.5                | 150              | fiber                | 134.8                              |
| 17  | MnO <sub>2</sub> -Tep -190 | 30                | 10.5                | 190              | fiber + belt         | 86.1                               |

**Fig. S1.** EDS mapping of MnO<sub>2</sub>-C-10.5.

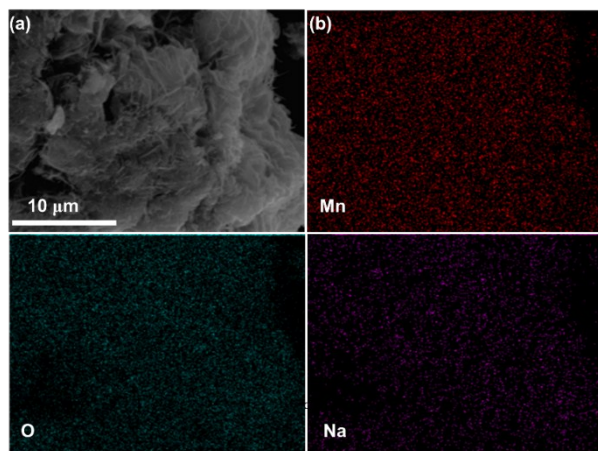

**Fig. S2.** Detailed SEM images of concentration-dependent MnO<sub>2</sub> products obtained at 170 °C for 30 h: (a) MnO<sub>2</sub>- C-2, (b) MnO<sub>2</sub>- C-4.5, (c) MnO<sub>2</sub>- C-6.5, (d) MnO<sub>2</sub>- C-8.5, (e) MnO<sub>2</sub>-C- 10.5, (f) MnO<sub>2</sub>- C-12.5.

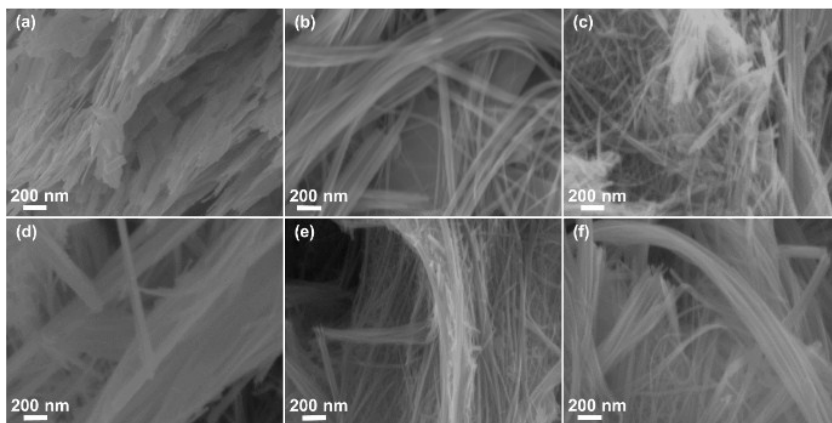

**Fig. S3.** High resolution SEM of time-dependent  $\text{MnO}_2$  samples in  $10.5 \text{ mol L}^{-1}$  NaOH aqueous solution at  $170 \text{ }^\circ\text{C}$ : (a)  $\text{MnO}_2\text{-Tim-0}$ , (b)  $\text{MnO}_2\text{-Tim-1.5}$ , (c)  $\text{MnO}_2\text{-Tim-3}$ , (d)  $\text{MnO}_2\text{-Tim-10}$ , (e)  $\text{MnO}_2\text{-Tim-20}$ , (f)  $\text{MnO}_2\text{-Tim-40}$ .

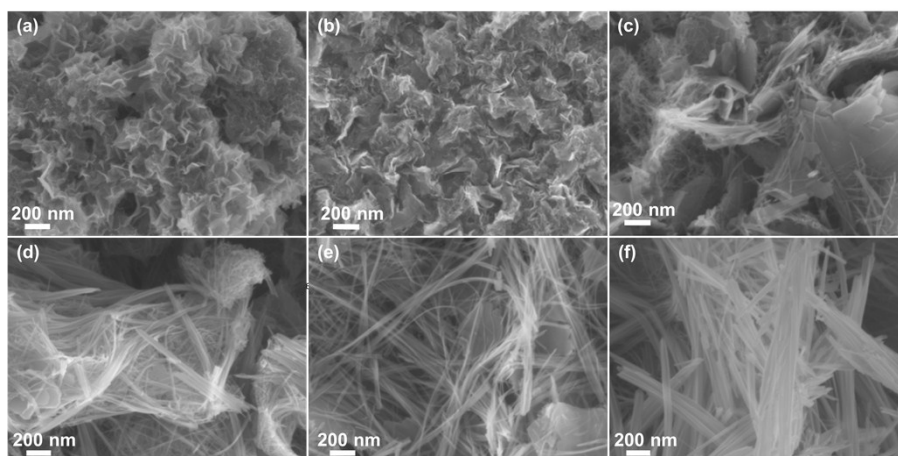

**Fig. S4.** The detailed SEM images of temperature-dependent MnO<sub>2</sub> materials prepared at 170 °C in 10.5 mol L<sup>-1</sup> NaOH solution. (a) MnO<sub>2</sub>-Tep-100, (b) MnO<sub>2</sub>-Tep-130, (c) MnO<sub>2</sub>-Tep-150, (d) MnO<sub>2</sub>-Tep-190.

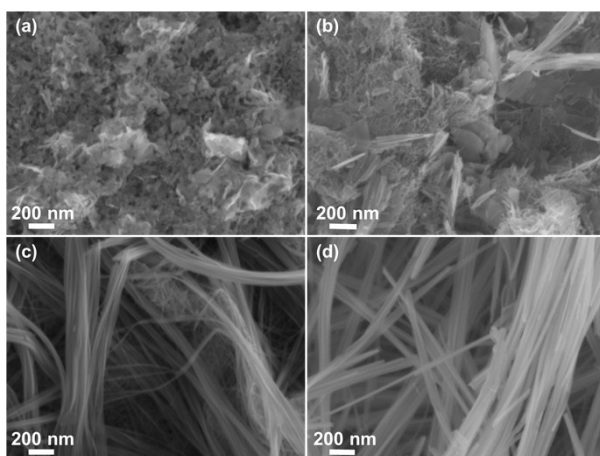

**Fig. S5.** the HRTEM and TEM images of MnO<sub>2</sub>-Tim-20 (a, c) and MnO<sub>2</sub>-C-10.5 (b, d).

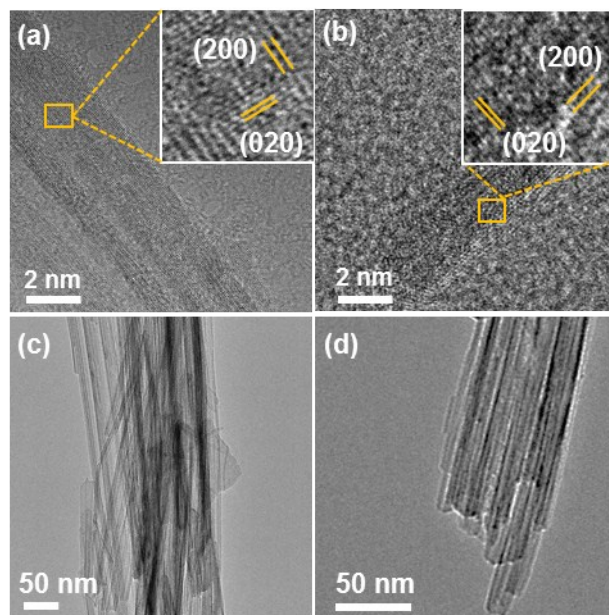

**Fig. S6.** Electrochemical impedance spectrum of MnO<sub>2</sub>-C-10.5 and MnO<sub>2</sub>-Tep-190 at open circuit potential in the frequency range from 0.01Hz to 100 kHz.

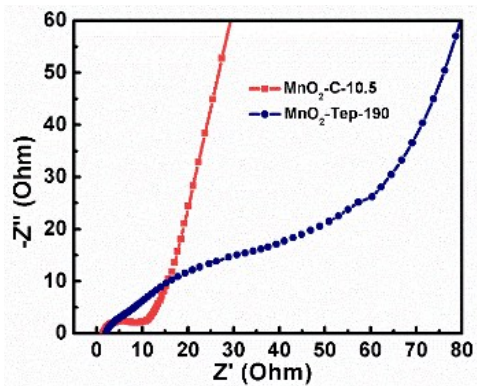

Supplement: c9ce00715f1.pdf [file c9ce00715f1.pdf]
